# Supplementary material
Source: PubMed Central journal article supplement (PMC5553108)
Supplement: NIHMS73406-supplement-Supplementary_File.pdf [file NIHMS73406-supplement-Supplementary_File.pdf]

## **Supplementary File**

### **Study Outcomes**

**Supplemental Table 1: Comparison of current study cohort to remainder of ALSPAC cohort**

**Supplemental Table 2: Odds of suboptimum outcomes according to maternal vitamin D status (< 50.0 vs  $\geq$  50.0 nmol/L): sensitivity analysis by adjusting for additional confounders**

**Supplemental Table 3: Odds of suboptimum outcomes in children according to maternal vitamin D status (< 25.0 vs  $\geq$  25.0 nmol/L), minimally adjusted and fully adjusted for potential confounders**

**Supplemental Table 4: Odds of suboptimum outcomes in children according to maternal vitamin D status (<75.0 vs  $\geq$ 75.0nmol/L), minimally adjusted and fully adjusted for potential confounders**

## **Study Outcomes**

We used the ALSPAC pre-school development assessments completed by the mothers between 6 and 42 months which provided scores for four domains, i.e. fine motor, gross motor, social development, and communication; items for this test were developed by ALSPAC based on those listed by Frankenburg<sup>1</sup>.

The Strengths and Difficulties Questionnaire (SDQ)<sup>2</sup> was completed by the mothers when the child was 81 months old. Published cut-offs<sup>2</sup>, as used previously in ALSPAC research<sup>3</sup> were used to define suboptimal development. The cut-off and percentage in the suboptimal group for the subscales are: pro-social behaviour ( $\leq 5$ ; 9.8%), peer problems ( $\geq 3$ ; 13.5%), hyperactivity ( $\geq 6$ ; 18.7%), emotional symptoms ( $\geq 4$ ; 12.2%) and conduct problems ( $\geq 3$ ; 24.3%) together with a total behavioural difficulties score ( $\geq 14$ ; 10.5%).

Child IQ was assessed at age 8 years by trained psychologists, with an abbreviated form of the Wechsler Intelligence Scale III for Children (WISC-III). The verbal, performance and total IQ scores were calculated using standard procedures, as previously described<sup>4</sup>.

At age 9 years, the children were asked to read 10 real words, with the sum of total correct responses comprising their "Reading Score"<sup>5</sup>. In addition by reading pieces of prose the reading speed, accuracy, and comprehension were assessed by trained psychologists, using the revised Neale Analysis of Reading Ability (NARA II)<sup>6</sup>.

As described in the online ALSPAC data dictionary, (<http://www.bristol.ac.uk/alspac/researchers/access/>) (Child Focussed Questionnaire F08 and F09; Built files) every effort was made to ensure inter-rater reliability. For WISC, Dr Clare Bell (who is experienced in psychometric testing) managed and observed the team of testers to ensure inter-rater compatibility, including how the tests were being administered and scored (See Child Focussed Questionnaire F08). For the reading tests staff were trained in order to reduce inter-observer variability, with regular quality control measurements and strict protocols for recording reading scores (See Child Focussed Questionnaire F09).

**Supplemental Table 1: Comparison of current study cohort to remainder of ALSPAC cohort**

| Confounder                         | This study cohort |          |     | Remaining ALSPAC cohort† |          |     | p value‡        |
|------------------------------------|-------------------|----------|-----|--------------------------|----------|-----|-----------------|
|                                    | n                 | Mean     | SD  | n                        | Mean     | SD  |                 |
| <b>BMI (kg/m<sup>2</sup>)</b>      | 6221              | 22.9     | 3.8 | 5016                     | 23.0     | 3.9 | 0.41            |
| <b>Maternal age (years)</b>        | 7065              | 28.3     | 4.8 | 6551                     | 27.7     | 5.2 | <0.0001         |
| <b>Breastfeeding (% yes)</b>       | 5264              | 78.7     |     | 4036                     | 75.6     |     | <0.0001         |
| <b>Crowding (% 1+ person/room)</b> | 404               | 6.0      |     | 454                      | 7.9      |     | <0.0001         |
| <b>Ethnicity (% white)</b>         | 6515              | 97.9     |     | 5185                     | 96.7     |     | 0.002           |
| <b>Gender (% male)</b>             | 3687              | 52.2     |     | 3336                     | 50.9     |     | 0.14            |
|                                    | <b>n</b>          | <b>%</b> |     | <b>n</b>                 | <b>%</b> |     | <b>p value§</b> |
| <b>Housing</b>                     |                   |          |     |                          |          |     |                 |
| Owned/mortgaged (%)                | 5192              | 76.3     |     | 4116                     | 69.8     |     | <0.0001         |
| Other rented (%)                   | 410               | 6.0      |     | 507                      | 8.6      |     |                 |
| Council rented (%)                 | 1199              | 17.6     |     | 1278                     | 21.7     |     |                 |
| <b>Iodine status</b>               |                   |          |     |                          |          |     |                 |
| Sufficient                         | 227               | 28.8     |     | 115                      | 32.4     |     | 0.23            |
| Deficient                          | 560               | 71.7     |     | 240                      | 67.6     |     |                 |
| <b>Maternal Education</b>          |                   |          |     |                          |          |     |                 |
| Low (%)                            | 1911              | 28.6     |     | 1724                     | 31.8     |     | <0.0001         |
| Medium (%)                         | 2369              | 35.5     |     | 1815                     | 33.5     |     |                 |
| High (%)                           | 2398              | 35.9     |     | 1884                     | 34.7     |     |                 |
| <b>Oily fish consumption</b>       |                   |          |     |                          |          |     |                 |
| Never/rarely                       | 2756              | 42.0     |     | 2242                     | 42.7     |     | 0.43            |
| Once a fortnight or more           | 3808              | 58.0     |     | 3007                     | 57.3     |     |                 |
| <b>Parity</b>                      |                   |          |     |                          |          |     |                 |
| Zero (%)                           | 3039              | 45.1     |     | 2620                     | 44.7     |     | 0.61            |
| One or more (%)                    | 3695              | 54.9     |     | 3245                     | 55.3     |     |                 |
| <b>Social class</b>                |                   |          |     |                          |          |     |                 |
| Manual (%)                         | 1047              | 19.0     |     | 900                      | 20.9     |     | 0.02            |
| Non-manual (%)                     | 4455              | 81.0     |     | 3401                     | 79.1     |     |                 |
| <b>Smoking in pregnancy</b>        |                   |          |     |                          |          |     |                 |
| Non-smoker (%)                     | 5219              | 76.3     |     | 4407                     | 73.6     |     | <0.0001         |
| Smoking at 18 weeks (%)            | 1621              | 23.7     |     | 1577                     | 26.4     |     |                 |

n: number of subjects † Remaining ALSPAC cohort defined as singletons from women who enrolled in the core ALSPAC sample with children surviving to 1 year (n13616); ‡ p value from independent t-test; § p value for  $\chi^2$  test.

**Supplemental Table 2: Odds of suboptimum outcomes according to maternal vitamin D status (< 50.0 vs ≥ 50.0 nmol/L): sensitivity analysis by adjusting for additional confounders**

|                                       |                    | Model 3 with causal pathway† |                   |         |                   | Model 3 with iodine ‡ |         |     |  |
|---------------------------------------|--------------------|------------------------------|-------------------|---------|-------------------|-----------------------|---------|-----|--|
|                                       |                    | Age                          | OR (95% CI)       | p value | n                 | OR (95% CI)           | p value | n   |  |
| <b>ALSPAC early development tests</b> | Gross Motor Skills | 6 mo§                        | 0.94 (0.80, 1.12) | 0.49    | 4329              | 0.80 (0.51, 1.25)     | 0.33    | 627 |  |
|                                       |                    | 18 mo                        | 1.16 (1.00, 1.35) | 0.05    | 4336              | 1.33 (0.90, 1.96)     | 0.15    | 635 |  |
|                                       |                    | 30 mo                        | 1.18 (1.01, 1.39) | 0.04    | 4084              | 1.47 (0.98, 2.20)     | 0.06    | 620 |  |
|                                       |                    | 42 mo                        | 1.08 (0.91, 1.27) | 0.39    | 4022              | 1.20 (0.79, 1.80)     | 0.39    | 621 |  |
|                                       | Fine Motor Skills  | 6 mo§                        | 1.05 (0.90, 1.23) | 0.52    | 4092              | 0.76 (0.47, 1.21)     | 0.25    | 597 |  |
|                                       |                    | 18 mo                        | 1.02 (0.88, 1.17) | 0.84    | 4336              | 1.50 (1.02, 2.23)     | 0.04    | 636 |  |
|                                       |                    | 30 mo                        | 1.20 (1.03, 1.40) | 0.02    | 4089              | 1.61 (1.06, 2.46)     | 0.02    | 631 |  |
|                                       |                    | 42 mo                        | 1.10 (0.94, 1.29) | 0.26    | 4023              | 1.20 (0.78, 1.86)     | 0.41    | 620 |  |
|                                       | Social Development | 6 mo§                        | 1.01 (0.85, 1.20) | 0.90    | 4157              | 0.85 (0.54, 1.33)     | 0.47    | 598 |  |
|                                       |                    | 18 mo                        | 1.15 (0.97, 1.35) | 0.10    | 4334              | 0.98 (0.63, 1.52)     | 0.92    | 636 |  |
|                                       |                    | 30 mo                        | 1.07 (0.91, 1.27) | 0.43    | 4078              | 1.19 (0.79, 1.81)     | 0.41    | 620 |  |
|                                       |                    | 42 mo                        | 1.18 (0.99, 1.39) | 0.06    | 4018              | 1.21 (0.78, 1.89)     | 0.39    | 619 |  |
| Communication                         | 6 mo§              | 0.99 (0.81, 1.20)            | 0.89              | 4235    | 0.90 (0.53, 1.55) | 0.71                  | 619     |     |  |
|                                       | 18 mo              | 1.12 (0.95, 1.31)            | 0.17              | 4341    | 0.73 (0.47, 1.13) | 0.16                  | 636     |     |  |
| <b>Behaviour</b>                      | Prosocial          | 7 yr                         | 1.00 (0.77, 1.31) | 0.97    | 3466              | 1.10 (0.57, 2.11)     | 0.77    | 580 |  |
|                                       | Peer problems      | 7 yr                         | 1.04 (0.83, 1.31) | 0.74    | 3463              | 1.07 (0.59, 1.94)     | 0.83    | 581 |  |
|                                       | Hyperactivity      | 7 yr                         | 1.02 (0.84, 1.25) | 0.84    | 3466              | 1.54 (0.91, 2.58)     | 0.11    | 582 |  |
|                                       | Emotional          | 7 yr                         | 1.21 (0.96, 1.53) | 0.10    | 3464              | 1.42 (0.80, 2.50)     | 0.23    | 581 |  |
|                                       | Conduct            | 7 yr                         | 1.06 (0.89, 1.28) | 0.52    | 3467              | 1.27 (0.82, 1.97)     | 0.29    | 581 |  |
|                                       | Total Score        | 7 yr                         | 1.24 (0.96, 1.60) | 0.10    | 3463              | 1.61 (0.83, 3.11)     | 0.16    | 581 |  |
| <b>Cognition</b>                      | Verbal IQ          | 8 yr                         | 0.99 (0.81, 1.22) | 0.95    | 2917              | 0.97 (0.60, 1.58)     | 0.91    | 625 |  |
|                                       | Performance IQ     | 8 yr                         | 0.99 (0.81, 1.21) | 0.93    | 2910              | 1.05 (0.66, 1.69)     | 0.83    | 625 |  |
|                                       | Total IQ           | 8 yr                         | 0.99 (0.80, 1.21) | 0.90    | 2903              | 0.81 (0.50, 1.32)     | 0.40    | 625 |  |
| <b>Reading ability</b>                | Words per min      | 9 yr                         | 1.17 (0.95, 1.43) | 0.15    | 2726              | 1.52 (0.96, 2.41)     | 0.07    | 597 |  |
|                                       | Accuracy           | 9 yr                         | 1.04 (0.84, 1.29) | 0.73    | 2730              | 1.24 (0.75, 2.04)     | 0.41    | 597 |  |
|                                       | Comprehension      | 9 yr                         | 1.04 (0.84, 1.29) | 0.73    | 2730              | 1.15 (0.69, 1.93)     | 0.59    | 597 |  |
|                                       | Reading Score      | 9 yr                         | 1.02 (0.84, 1.24) | 0.81    | 2988              | 1.34 (0.85, 2.09)     | 0.21    | 604 |  |

mo, month; OR, odds ratio; n, number of subjects; yr, years. Suboptimal outcome defined as scores in the bottom quartile for ALSPAC pre-school development assessments, cognition, and reading ability. Published cut-offs<sup>2</sup> were used for behaviour: Prosocial (≤5; 9.8%), Peer problems (≥3; 13.5%), hyperactivity (≥6; 18.7%), emotional symptoms (≥4; 12.2%), conduct problems (≥3; 24.3%), and total score (≥14; 10.5%). †Model 3 plus birthweight (<2500 or ≥2500 g) and preterm birth (<37 weeks or ≥37 weeks). ‡Model 3 plus suboptimal iodine-to-creatinine ratio in the first trimester [sufficient (≥150 µg/g) or deficient (<150 µg/g)]. As just 787 women also had measure of iodine, we used a simplified model to ensure that the model would converge; we excluded ethnicity and crowding. § Age of child at development test included in all models.

**Supplemental Table 3: Odds of suboptimum outcomes in children according to maternal vitamin D status (< 25.0 vs ≥ 25.0 nmol/L), minimally adjusted and fully adjusted for potential confounders**

|                                       |                    | Model1†       |                   |                   |      | Model2‡           |                   |      | Model3§           |                   |      |      |
|---------------------------------------|--------------------|---------------|-------------------|-------------------|------|-------------------|-------------------|------|-------------------|-------------------|------|------|
|                                       |                    | Age           | OR (95% CI)       | p value           | n    | OR (95% CI)       | p value           | n    | OR (95% CI)       | p value           | n    |      |
| <b>ALSPAC early development tests</b> | Gross Motor Skills | 6 mo ‖        | 1.22(0.91, 1.63)  | 0.18              | 6242 | 1.42 (1.00, 2.03) | 0.05              | 4383 | 1.35 (0.94, 1.93) | 0.10              | 4380 |      |
|                                       |                    | 18 mo         | 1.04 (0.80, 1.36) | 0.76              | 6269 | 1.25 (0.90, 1.74) | 0.18              | 4385 | 1.32 (0.95, 1.84) | 0.10              | 4383 |      |
|                                       |                    | 30 mo         | 1.31 (0.99, 1.73) | 0.06              | 5843 | 1.39 (0.99, 1.96) | 0.06              | 4135 | 1.43 (1.01, 2.02) | 0.05              | 4133 |      |
|                                       |                    | 42 mo         | 1.02 (0.75, 1.39) | 0.89              | 5695 | 1.16 (0.80, 1.68) | 0.44              | 4073 | 1.20 (0.83, 1.75) | 0.34              | 4070 |      |
|                                       | Fine Motor Skills  | 6 mo ‖        | 0.97 (0.73, 1.30) | 0.84              | 5880 | 1.24 (0.87, 1.79) | 0.24              | 4141 | 1.22 (0.84, 1.76) | 0.29              | 4139 |      |
|                                       |                    | 18 mo         | 0.91 (0.69, 1.20) | 0.50              | 6268 | 0.97 (0.69, 1.37) | 0.86              | 4383 | 0.99 (0.70, 1.40) | 0.94              | 4381 |      |
|                                       |                    | 30 mo         | 1.13 (0.85, 1.50) | 0.40              | 5854 | 1.21 (0.85, 1.73) | 0.28              | 4138 | 1.19 (0.84, 1.71) | 0.33              | 4136 |      |
|                                       |                    | 42 mo         | 1.32 (0.99, 1.76) | 0.06              | 5692 | 1.21 (0.83, 1.76) | 0.31              | 4071 | 1.23 (0.84, 1.80) | 0.28              | 4068 |      |
|                                       | Social Development | 6 mo ‖        | 1.01 (0.75, 1.37) | 0.95              | 6010 | 1.06 (0.74, 1.54) | 0.74              | 4209 | 1.02 (0.70, 1.49) | 0.91              | 4207 |      |
|                                       |                    | 18 mo         | 1.16 (0.88, 1.54) | 0.29              | 6268 | 1.21 (0.85, 1.73) | 0.30              | 4383 | 1.22 (0.85, 1.75) | 0.29              | 4381 |      |
|                                       |                    | 30 mo         | 0.98 (0.72, 1.32) | 0.88              | 5843 | 0.93 (0.63, 1.38) | 0.73              | 4129 | 0.88 (0.60, 1.30) | 0.51              | 4127 |      |
|                                       |                    | 42 mo         | 1.37 (1.03, 1.82) | 0.03              | 5689 | 1.41 (0.98, 2.03) | 0.07              | 4069 | 1.40 (0.97, 2.02) | 0.08              | 4066 |      |
|                                       | Communication      | 6 mo ‖        | 1.06 (0.75, 1.50) | 0.73              | 6100 | 1.46 (0.98, 2.19) | 0.06              | 4285 | 1.44 (0.96, 2.17) | 0.08              | 4283 |      |
|                                       |                    | 18 mo         | 1.11 (0.85, 1.48) | 0.43              | 6279 | 1.29 (0.91, 1.82) | 0.15              | 4390 | 1.26 (0.89, 1.79) | 0.19              | 4388 |      |
|                                       | <b>Behaviour</b>   | Prosocial     | 7 yr              | 1.11 (0.69, 1.78) | 0.68 | 4791              | 1.07 (0.58, 1.98) | 0.83 | 3513              | 1.11 (0.68, 2.08) | 0.73 | 3511 |
|                                       |                    | Peer problems | 7 yr              | 1.04 (0.68, 1.59) | 0.84 | 4785              | 0.96 (0.56, 1.63) | 0.88 | 3510              | 0.94 (0.55, 1.62) | 0.84 | 3508 |
| Hyperactivity                         |                    | 7 yr          | 0.70 (0.46, 1.06) | 0.10              | 4780 | 0.62 (0.36, 1.05) | 0.08              | 3513 | 0.61 (0.36, 1.04) | 0.07              | 3511 |      |
| Emotional                             |                    | 7 yr          | 0.85 (0.53, 1.36) | 0.50              | 4785 | 0.72 (0.39, 1.32) | 0.29              | 3511 | 0.73 (0.39, 1.35) | 0.31              | 3509 |      |
| Conduct                               |                    | 7 yr          | 0.93 (0.65, 1.31) | 0.66              | 4790 | 0.77 (0.49, 1.21) | 0.26              | 3514 | 0.76 (0.48, 1.21) | 0.25              | 3512 |      |
| Total Score                           |                    | 7 yr          | 0.63 (0.36, 1.12) | 0.12              | 4777 | 0.57 (0.28, 1.15) | 0.12              | 3510 | 0.60 (0.30, 1.22) | 0.16              | 3508 |      |
| <b>Cognition</b>                      | Verbal IQ          | 8 yr          | 1.51 (1.06, 2.14) | 0.02              | 3997 | 1.20 (0.76, 1.91) | 0.44              | 2952 | 1.07 (0.67, 1.71) | 0.76              | 2950 |      |
|                                       | Performance IQ     | 8 yr          | 1.32 (0.92, 1.89) | 0.13              | 3990 | 1.43 (0.92, 2.21) | 0.12              | 2945 | 1.42 (0.91, 2.21) | 0.12              | 2943 |      |
|                                       | Total IQ           | 8 yr          | 1.47 (1.03, 2.09) | 0.03              | 3978 | 1.46 (0.93, 2.28) | 0.10              | 2938 | 1.39 (0.89, 2.18) | 0.15              | 2936 |      |
| <b>Reading ability</b>                | Words per min      | 9 yr          | 1.03 (0.72, 1.49) | 0.87              | 3794 | 1.05 (0.65, 1.68) | 0.85              | 2763 | 1.04 (0.64, 1.67) | 0.88              | 2761 |      |
|                                       | Accuracy           | 9 yr          | 1.07 (0.74, 1.54) | 0.74              | 3802 | 1.17 (0.73, 1.89) | 0.52              | 2767 | 1.14 (0.70, 1.84) | 0.61              | 2765 |      |
|                                       | Comprehension      | 9 yr          | 1.05 (0.73, 1.52) | 0.80              | 3802 | 0.98 (0.60, 1.60) | 0.94              | 2767 | 0.98 (0.60, 1.62) | 0.96              | 2765 |      |
|                                       | Reading Score      | 9 yr          | 0.87 (0.60, 1.25) | 0.45              | 4125 | 0.92 (0.58, 1.46) | 0.74              | 3028 | 0.89 (0.56, 1.41) | 0.61              | 3026 |      |

mo, month; OR, odds ratio; n, number of subjects; yr, years. Suboptimal outcome defined as scores in the bottom quartile for ALSPAC pre-school development assessments, cognition, and reading ability. Published cut-offs<sup>2</sup> were used for behaviour: Prosocial ( $\leq 5$ ; 9.8%), Peer problems ( $\geq 3$ ; 13.5%), hyperactivity ( $\geq 6$ ; 18.7%), emotional symptoms ( $\geq 4$ ; 12.2%), conduct problems ( $\geq 3$ ; 24.3%), and total score ( $\geq 14$ ; 10.5%). Maternal vitamin D status  $>50$ nmol/L was the reference group. †Model 1 adjusted for gestational week of vitamin D measurement; ‡Model 2: gestational week of vitamin D measurement plus additional 11 variables: maternal age, maternal BMI, maternal ethnic group, maternal education, maternal social class, parity, tobacco smoking in 1st trimester, home ownership status, crowding index, child gender, breastfeeding; §Model 3: additionally adjusted for oily fish and season of vitamin D measurement. ‖Age of child at development test included in all models.

**Supplemental Table 4: Odds of suboptimum outcomes in children according to maternal vitamin D status (<75.0 vs ≥75.0nmol/L), minimally adjusted and fully adjusted for potential confounders**

|                                       |                    | Model1†           |                   |         |                   | Model2‡           |         |                   |                   | Model3§ |      |  |  |
|---------------------------------------|--------------------|-------------------|-------------------|---------|-------------------|-------------------|---------|-------------------|-------------------|---------|------|--|--|
|                                       |                    | Age               | OR (95% CI)       | p value | n                 | OR (95% CI)       | p value | n                 | OR (95% CI)       | p value | n    |  |  |
| <b>ALSPAC early development tests</b> | Gross Motor Skills | 6 mo ‖            | 1.02 (0.90, 1.16) | 0.76    | 6242              | 1.05 (0.90, 1.23) | 0.54    | 4383              | 1.00 (0.85, 1.18) | 1.00    | 4380 |  |  |
|                                       |                    | 18 mo             | 0.96 (0.86, 1.06) | 0.48    | 6269              | 1.05 (0.91, 1.20) | 0.52    | 4385              | 1.11 (0.96, 1.29) | 0.15    | 4383 |  |  |
|                                       |                    | 30 mo             | 0.95 (0.84, 1.08) | 0.45    | 5843              | 1.03 (0.89, 1.20) | 0.67    | 4135              | 1.06 (0.91, 1.24) | 0.47    | 4133 |  |  |
|                                       |                    | 42 mo             | 0.98 (0.87, 1.12) | 0.80    | 5695              | 1.00 (0.86, 1.17) | 0.99    | 4073              | 1.05 (0.89, 1.23) | 0.59    | 4070 |  |  |
|                                       | Fine Motor Skills  | 6 mo ‖            | 0.86 (0.76, 0.98) | 0.02    | 5880              | 0.94 (0.81, 1.10) | 0.46    | 4141              | 0.92 (0.78, 1.08) | 0.32    | 4139 |  |  |
|                                       |                    | 18 mo             | 1.05 (0.94, 1.19) | 0.39    | 6268              | 0.98 (0.85, 1.13) | 0.79    | 4383              | 1.03 (0.89, 1.20) | 0.69    | 4381 |  |  |
|                                       |                    | 30 mo             | 0.95 (0.84, 1.07) | 0.39    | 5854              | 0.95 (0.82, 1.10) | 0.50    | 4138              | 0.95 (0.81, 1.11) | 0.48    | 4136 |  |  |
|                                       |                    | 42 mo             | 0.99 (0.87, 1.13) | 0.88    | 5692              | 0.96 (0.82, 1.12) | 0.62    | 4071              | 0.98 (0.83, 1.16) | 0.85    | 4068 |  |  |
|                                       | Social Development | 6 mo ‖            | 0.94 (0.82, 1.07) | 0.32    | 6010              | 0.91 (0.78, 1.06) | 0.22    | 4209              | 0.87 (0.74, 1.03) | 0.11    | 4207 |  |  |
|                                       |                    | 18 mo             | 0.97 (0.86, 1.10) | 0.64    | 6268              | 0.99 (0.85, 1.15) | 0.91    | 4383              | 1.01 (0.86, 1.19) | 0.88    | 4381 |  |  |
|                                       |                    | 30 mo             | 0.93 (0.82, 1.05) | 0.26    | 5843              | 1.00 (0.86, 1.17) | 0.96    | 4129              | 0.95 (0.81, 1.12) | 0.55    | 4127 |  |  |
|                                       |                    | 42 mo             | 0.95 (0.83, 1.08) | 0.40    | 5689              | 0.95 (0.82, 1.12) | 0.56    | 4069              | 0.93 (0.79, 1.10) | 0.39    | 4066 |  |  |
| Communication                         | 6 mo ‖             | 0.97 (0.84, 1.13) | 0.71              | 6100    | 0.96 (0.80, 1.15) | 0.64              | 4285    | 0.95 (0.78, 1.15) | 0.61              | 4283    |      |  |  |
|                                       | 18 mo              | 0.96 (0.85, 1.08) | 0.51              | 6279    | 1.00 (0.86, 1.16) | 0.98              | 4390    | 0.99 (0.84, 1.16) | 0.88              | 4388    |      |  |  |
| <b>Behaviour</b>                      | Prosocial          | 7 yr              | 1.00 (0.83, 1.23) | 0.97    | 4791              | 0.94 (0.74, 1.20) | 0.61    | 3513              | 0.97 (0.75, 1.25) | 0.79    | 3511 |  |  |
|                                       | Peer problems      | 7 yr              | 1.16 (0.97, 1.39) | 0.11    | 4785              | 1.06 (0.86, 1.31) | 0.59    | 3510              | 1.09 (0.87, 1.37) | 0.46    | 3508 |  |  |
|                                       | Hyperactivity      | 7 yr              | 1.16 (0.99, 1.35) | 0.07    | 4780              | 1.07 (0.89, 1.29) | 0.48    | 3513              | 1.07 (0.87, 1.30) | 0.52    | 3511 |  |  |
|                                       | Emotional          | 7 yr              | 1.08 (0.90, 1.30) | 0.42    | 4785              | 1.00 (0.81, 1.25) | 0.97    | 3511              | 1.05 (0.83, 1.32) | 0.71    | 3509 |  |  |
|                                       | Conduct            | 7 yr              | 0.98 (0.85, 1.12) | 0.75    | 4790              | 0.86 (0.73, 1.02) | 0.09    | 3514              | 0.86 (0.72, 1.03) | 0.10    | 3512 |  |  |
|                                       | Total Score        | 7 yr              | 1.07 (0.88, 1.31) | 0.49    | 4777              | 0.96 (0.75, 1.21) | 0.71    | 3510              | 1.03 (0.80, 1.33) | 0.81    | 3508 |  |  |
| <b>Cognition</b>                      | Verbal IQ          | 8 yr              | 1.23 (1.05, 1.43) | 0.01    | 3997              | 1.16 (0.95, 1.41) | 0.14    | 2952              | 1.09 (0.89, 1.35) | 0.41    | 2950 |  |  |
|                                       | Performance IQ     | 8 yr              | 1.07 (0.92, 1.25) | 0.38    | 3990              | 0.96 (0.80, 1.16) | 0.67    | 2945              | 0.98 (0.80, 1.19) | 0.80    | 2943 |  |  |
|                                       | Total IQ           | 8 yr              | 1.15 (0.99, 1.34) | 0.07    | 3978              | 1.00 (0.83, 1.22) | 0.96    | 2938              | 1.00 (0.82, 1.23) | 0.99    | 2936 |  |  |
| <b>Reading ability</b>                | Words per min      | 9 yr              | 1.13 (0.97, 1.33) | 0.12    | 3794              | 1.16 (0.96, 1.42) | 0.13    | 2763              | 1.18 (0.96, 1.46) | 0.12    | 2761 |  |  |
|                                       | Accuracy           | 9 yr              | 1.25 (1.06, 1.47) | 0.007   | 3802              | 1.25 (1.02, 1.53) | 0.04    | 2767              | 1.26 (1.01, 1.57) | 0.04    | 2765 |  |  |
|                                       | Comprehension      | 9 yr              | 1.19 (1.01, 1.39) | 0.03    | 3802              | 1.07 (0.87, 1.31) | 0.52    | 2767              | 1.10 (0.89, 1.37) | 0.38    | 2765 |  |  |
|                                       | Reading Score      | 9 yr              | 1.12 (0.97, 1.30) | 0.12    | 4125              | 1.10 (0.92, 1.32) | 0.29    | 3028              | 1.08 (0.90, 1.31) | 0.41    | 3026 |  |  |

mo, month; OR, odds ratio; n, number of subjects; yr, years. Suboptimal outcome defined as scores in the bottom quartile for ALSPAC pre-school development assessments, cognition, and reading ability. Published cut-offs<sup>2</sup> were used for behaviour: Prosocial (≤5; 9·8%), Peer problems (≥3; 13·5%), hyperactivity (≥6; 18·7%), emotional symptoms (≥4; 12·2%), conduct problems (≥3; 24·3%), and total score (≥14; 10·5%). Maternal vitamin D status >50nmol/L was the reference group. †Model 1 adjusted for gestational week of vitamin D measurement; ‡Model 2: gestational week of vitamin D measurement plus additional 11 variables: maternal age, maternal BMI, maternal ethnic group, maternal education, maternal social class, parity, tobacco smoking in 1st trimester, home ownership status, crowding index, child gender, breastfeeding; §Model 3: additionally adjusted for oily fish and season of vitamin D measurement. ‖Age of child at development test included in all models.

## References

1. Frankenburg WK, Dodds JB. The Denver developmental screening test. *The Journal of pediatrics* 1967; **71**(2): 181-91.
2. Goodman R. The Strengths and Difficulties Questionnaire: a research note. *Journal of child psychology and psychiatry, and allied disciplines* 1997; **38**(5): 581-6.
3. Peacock PJ, Lewis G, Northstone K, Wiles NJ. Childhood diet and behavioural problems: results from the ALSPAC cohort. *Eur J Clin Nutr* 2011; **65**(6): 720-6.
4. Hibbeln JR, Davis JM, Steer C, et al. Maternal seafood consumption in pregnancy and neurodevelopmental outcomes in childhood (ALSPAC study): an observational cohort study. *Lancet* 2007; **369**(9561): 578-85.
5. Nunes T, Bryant PJO. Learning morphological and phonological spelling rules: an intervention study. *Scientific Studies of Reading* 2003; **7**: 298–307.
6. Neale M. Neale Analysis of Reading Ability- Revised. Windsor: NFER-Nelson; 1997.
